# **Development and validation of an LC-MS/MS method for determination of B vitamins and some its derivatives in whole blood**

**David Kahoun<sup>a,\*</sup>, Pavla Fojtíková<sup>a</sup>, František Vácha<sup>a</sup>, Eva Nováková<sup>b</sup> and Václav**

**Hypša<sup>b</sup>**

*<sup>a</sup> Institute of Chemistry, Faculty of Science, University  
of South Bohemia in České Budějovice, Branišovská 1760, 37005 České  
Budějovice, Czech Republic*

*<sup>b</sup> Department of Parasitology, Faculty of Science, University  
of South Bohemia in České Budějovice, Branišovská 1760, 37005 České  
Budějovice, Czech Republic*

**\*Corresponding author:**

Full postal address: David Kahoun, Institute of Chemistry, Faculty of Science,  
University of South Bohemia in České Budějovice, Branišovská  
1760, 37005 České Budějovice, Czech Republic

E-mail address: [dkahoun@prf.jcu.cz](mailto:dkahoun@prf.jcu.cz)

Telephone number: +420 737 916 787

## Highlights

- LC-MS/MS method for quantitation of eight B vitamins and four B vitamin derivatives was developed.
- Deproteinization agents trichloroacetic acid and ZnSO<sub>4</sub>/methanol were tested for protein precipitation of whole blood.
- Accuracy, precision and process efficiency were evaluated.
- Successful method validation for seven B vitamins and two B vitamin derivatives in whole blood.

## Abstract

Obligate symbiotic bacteria associated with the insects feeding exclusively on vertebrate blood are supposed to complement B vitamins presumably lacking in their diet, vertebrate blood. Recent genomic analyses revealed considerable differences in biosynthetic capacities across different symbionts, indicating that levels of B vitamins vary across different vertebrate hosts. However, a rigorous determination of B vitamins content in blood of various vertebrates has not yet been approached. A reliable analytical method focused on B vitamin complex in blood and hemolymph can provide valuable informative background and understanding of general principles of insect symbiosis.

In this work chromatographic separation of a mixture of eight B vitamins (B1 – thiamine, B2 – riboflavin, B3 – niacin, B5 – pantothenic acid, B6 – pyridoxine, B7 – biotin, B9 – folic acid and B12 – cyanocobalamine), four B vitamin derivatives (B3 – niacinamide, B6 – pyridoxal-5-phosphate, B6 – 4-pyridoxic acid and B9 – tetrahydrofolic acid) and 3 stable isotope labelled internal standards (B3 – niacin- $^{13}\text{C}_6$ , B5 – pantothenic acid (di- $\beta$ -alanine- $^{13}\text{C}_6,^{15}\text{N}_2$ ) and B7 – biotin-(ring-6,6-d $_2$ )) on C30 column was developed. Detection was carried out using dual-pressure linear ion trap mass spectrometer in FullScan MS/MS and SIM mode. Matching internal standards with analytes was done according to the results of linearity, accuracy and precision. Except for vitamin B9 (tetrahydrofolic acid) instrument quantitation limits of all analytes were ranging from 0.42 to 5.0  $\mu\text{g/L}$ , correlation coefficients from 0.9997 to 1.0000 and QC coefficients from 0.53 to 3.2 %.

Optimization of whole blood sample preparation step was focused especially on evaluation of two types of protein-precipitation agents: trichloroacetic acid and zinc sulphate in methanol. Samples of whole blood prepared in six independent replicates

were spiked at 10 µg/L and 100 µg/L level. The best results were obtained for zinc sulphate in methanol, but only nine analytes (B1 – thiamine, B2 – riboflavin, B3 – niacin, B3 – niacinamide, B5 – pantothenic acid, B6 – pyridoxine, B6 – 4-pyridoxic acid, B7 – biotin and B12 – cyanocobalamine) were successfully validated. Accuracy of the procedure using this protein-precipitating agent was ranging from 89 to 120 %, precision from 0.5 to 13 % and process efficiency from 65 to 108 %.

**Keywords:** B vitamin, Whole blood, Protein precipitation, Liquid Chromatography, Mass Spectrometry.

## 1. Introduction

B vitamins are supposed to play a central role in the origin and evolution of obligate symbiosis between insects and bacteria. It has been generally accepted that the main role of the maternally inherited obligate symbionts, so called primary symbionts (P-symbionts), is to provide their hosts with compounds missing in their diets, mainly amino acids, vitamins and cofactors [1]. Two ecological groups of insects are recognized as typical hosts of P-symbionts, namely phytophages (e.g. aphids with *Buchnera*) and hematophages (e.g. tsetse with *Wigglesworthia*). The early experiments on the tsetse-*Wigglesworthia* system showed that elimination of symbionts by antibiotics causes loss of fertility, which can be restored by dietary supplementation with B vitamins [2]. Similar results were reported for human louse *Pediculus humanus* and its bacterial symbionts [3]. Based on these experiments, it was hypothesized that biosynthesis of B vitamins is one of the main roles of these P-symbionts. The molecular era then brought proofs of genome capacity for B vitamin synthesis in *Wigglesworthia glossinidia* and also some other P-symbionts in blood feeding insects [4, 5, 6]. The lack of B vitamins in vertebrate blood and their provision by P-symbionts, thus became a generally accepted reason for the symbiosis between blood feeding insects and bacteria.

Recently, genomic data became available for several symbionts of hematophagous host. Their overview indicates that the biosynthetic capacities vary across different insects-bacteria associations and different vitamins. For example, biotin seems to be mostly provided by the symbiotic bacteria and several instances of HGT of complete biotin operon into the symbionts suggests crucial role of this pathway in the host-symbiont interaction [5, 7]. On the other hand, many symbionts in blood-feeding insects lack the capacity to produce thiamine and they may even scavenge this compound

from the host [5, 8].

Considering these long-lasting debates and the significance of blood feeding insects, it comes as a surprise that very little is known about how the amounts of particular B vitamins vary in blood of different vertebrate species. This example illustrates an importance of a precise analytical assay of B vitamins in blood when addressing particular biological questions.

Vitamins of the B complex (B1 – thiamine, B2 – riboflavin, B3 – niacin, B5 – pantothenic acid, B6 – pyridoxine, B7 – biotin, B9 – folic acid and B12 – cyanocobalamine) are a set of low-molecular-weight water-soluble substances that play a key role in many metabolic pathways. Vertebrates generally maintain a low concentration of B vitamins in the blood, do not store them and are dependent on their dietary content.

Some of the B vitamins can be found in blood or tissues in different forms, vitamers or provitamins. Vitamin B1 may be present as the thiamine monophosphate, diphosphate or triphosphate esters, vitamin B3 as the niacinamide, vitamin B6 as the aldehyde pyridoxal, amine pyridoxamine, their corresponding 5'-phosphate derivatives and the pyridoxic acid as a degradation product, vitamin B9 as the tetrahydrofolic acid and vitamin B12 as methyl-, hydroxo- or adenosyl- derivate of cobalamin.

Analysis of a content of individual B vitamins is widely used in a clinical practice and physiology research. However, each vitamin of the B complex is usually analysed separately (e.g. see [9]) or simultaneously only those of the particular interest [10], according to the individual study needs. Various methods of B vitamins analysis are generally used, including microbiological assays, radio immunoassay, protein binding, spectrophotometry, fluorimetry, chemiluminescence, capillary electrophoresis or high-performance liquid chromatography (HPLC) [11, 12, 13]. However, using different

analytical methods for different B vitamins introduces many obstacles into the comprehensive surveys where comparing precise levels is crucial.

Recently, liquid chromatography has been established as the most frequently used emerging method for the determination of B vitamins, with the advantage of multi-analytes detection of most of the water-soluble vitamins in single run. The tandem mass spectrometry (MS/MS) detection shows the best results in sensitivity and specificity. Several methods for simultaneous detection of B vitamins using LC-MS/MS are reported in literature for the analysis of various food matrices, human milk or plasma [14, 15, 16, 17].

Unfortunately, a comprehensive method of the analysis of all B vitamins of the vertebrate whole blood samples is missing. With a respect to the whole blood as a nutrient source for blood sucking arthropods and the fact that about 80 to 90 % of the vitamin B1 is present in red blood cells [18, 19, 20], an analytical method for all B vitamins in the whole blood samples is necessary.

In this work, we present a comprehensive analytical method for separation and detection of B vitamins from a whole blood sample in a single run based on HPLC-MS/MS.

## 2. Materials and methods

### 2.1 Chemicals and reagents

All standards and internal standards (IS) were purchased from Sigma-Aldrich: thiamine hydrochloride (CAS: 67-03-8, purity: CRM, abr.: B1), riboflavin (CAS: 83-88-5, purity: CRM, abr.: B2), niacin (CAS: 59-67-6, purity: CRM, abr.: B3), niacinamide (CAS: 98-92-0, abr.: purity: CRM, B3-AM) calcium-d-pantothenate (CAS: 137-08-6, purity: CRM, abr.: B5), pyridoxine hydrochloride (CAS: 58-56-0, purity: CRM, abr.: B6) 4-pyridoxic acid (CAS: 82-82-6, purity: ≥98%, abr.: B6-4PA) pyridoxal 5'-phosphate hydrate (CAS: 853645-22-4, purity: ≥98%, abr.: B6-5P), biotin (CAS: 58-85-5, purity: CRM, abr.: B7), folic acid (CAS: 59-30-3, purity: CRM, abr.: B9), tetrahydrofolic acid (CAS: 135-16-0, purity: ≥65%, abr. B9-THF), cyanocobalamine (CAS: 68-19-9, purity: CRM, abr.: B12), nicotinic acid-<sup>13</sup>C<sub>6</sub> (CAS: 1189954-79-7, 100 µg/mL in methanol, abr. IS-B3), calcium pantothenate-<sup>13</sup>C<sub>6</sub>, <sup>15</sup>N<sub>2</sub> (di-β-alanine-<sup>13</sup>C<sub>6</sub>, <sup>15</sup>N<sub>2</sub>) (CAS: N.A., purity ≥97%, abr.: IS-B5) and biotin-(ring-6,6-d2) (CAS: 1217481-41-8, purity ≥97%, abr.: IS-B7). Compounds were stored in original packages at -75°C prior to use.

Acetonitrile (LiChrosolv, hypergrade for LC-MS), methanol (LiChrosolv, hypergrade for LC-MS), formic acid (eluent additive for LC-MS), ammonium formate (eluent additive for LC-MS), zinc sulfate heptahydrate (ACS reag. ≥99%) and trichloroacetic acid (ACS reag. ≥99.5%) were purchased also from Sigma-Aldrich. Deionized water was prepared using a purification system Thermo Scientific Smart2Pure 6 UV/UF.

### 2.2 Standard, internal standard and calibration solutions

Standard stock solutions were prepared individually by dissolving appropriate amount of each compound in methanol (B1, B2, B3, B3-AM, B6 and B12), in 1% HCOOH (B5), in 0.5% NH<sub>4</sub>OH (B7), in 4% NH<sub>4</sub>OH (B9), in 0.01M HCl (B6-4PA), in 50% methanol



(B6-5P) or in water (B9-THF) to obtain concentration approx. 1000 mg/L (except for B2, B6-4PA, B6-5p and B9-THF where the concentration was 10 mg/L). All standard stock solutions were stored at -75°C. The standard mixture solution A (10 mg/L) was prepared daily in a glass volumetric flask (5 mL) by diluting the calculated amount of each standard stock solution with water and then diluted to obtain the standard mixture working solution B (1 mg/L).

Internal standard stock solutions were prepared individually by dissolving appropriate amount of each compound in 1% HCOOH (IS-B5) or in 0.5% NH<sub>4</sub>OH (IS-B7) to obtain concentration approx. 200-500 mg/L. Stock solution of internal standard IS-B3 was obtained commercially as an ampule of 1 mL solution (100 mg/L in methanol). All internal standard stock solutions were stored at -75°C. The internal standard working mixture solution was prepared daily by diluting of 100 µl of each internal standard stock solution with 4.7 mL of water to obtain concentration 2-5 mg/L.

Calibration solutions were prepared daily in brown glass HPLC crimp vials (1.8 mL) diluting the standard working solution B (5 – 500 µL) and the internal standard working solution (100 µL) with water (400 – 895 µL) to obtain 9 different concentrations: 1; 2.5; 5; 10; 25; 50; 100; 250 and 500 µg/L. Total volume of each calibration solution was 1000 µL. Calibration solutions were analysed in triplicate.

### **2.3 Sample collection and preparation**

Whole blood samples used for the method development and validation were collected by the licensed practical nurse into 3 mL blood collection tubes containing an anticoagulant potassium ethylenediaminetetra-acetic acid (K3EDTA) purchased from

Dialab. The blood collection tubes were mixed and immediately placed into a closable box containing crushed ice. All samples were prepared for the analysis by the working procedures mentioned below within 1 hour after sample collection and immediately analysed in triplicate.

### **2.3.1 Sample preparation using TCA**

For the analysis using trichloroacetic acid as a precipitating agent (TCA), 100  $\mu\text{L}$  of water and 100  $\mu\text{L}$  of internal standard working solution were mixed in a 1.8 mL Eppendorf tube with 500  $\mu\text{L}$  of whole blood and then deproteinized by adding 300  $\mu\text{L}$  of TCA-agent (2.0 g of trichloroacetic acid in 8.0 mL of water). Samples were vortexed for  $\sim 10$  s, placed into the closable box containing crushed ice for 15 min and then centrifuged at 20,000xg for 10 min. Clarified supernatant was transferred to the brown glass HPLC crimp vial (1.8 mL) for analysis. The spiked samples were prepared as mentioned above and 100  $\mu\text{L}$  of appropriate standard solution was used instead of 100  $\mu\text{L}$  water. In the case of the blank samples, 500  $\mu\text{L}$  of water was used instead of 500  $\mu\text{L}$  of whole blood.

### **2.3.2 Sample preparation using ZnSO<sub>4</sub>/methanol**

Samples with precipitating agent zinc sulfate heptahydrate in methanol were prepared and analysed. Water (100  $\mu\text{L}$ ) and internal standard working solution (100  $\mu\text{L}$ ) were mixed in a 1.8 mL Eppendorf tube with 300  $\mu\text{L}$  of whole blood and then deproteinized by adding 500  $\mu\text{L}$  of ZnSO<sub>4</sub>-agent (300mM ZnSO<sub>4</sub>.7H<sub>2</sub>O mixed with methanol in a ratio of 3:7 v/v). Samples were vortexed for  $\sim 10$  s, placed into the closable box containing crushed ice for 15 min and then centrifuged at 20,000xg for 10 min. Clarified supernatant was transferred to the brown glass HPLC crimp vial (1.8 mL) for analysis.

Again, the spiked sample were prepared as mentioned above and 100  $\mu$ L of appropriate standard solution was used instead of 100  $\mu$ L water. In the case of the blank samples, 300  $\mu$ L of water was used instead of 300  $\mu$ L of whole blood.

## 2.4 LC-MS/MS analysis

Liquid chromatography was performed by a Thermo Scientific Dionex Ultimate 3000. Quaternary Analytical system was consisted of a solvent rack SRD-3600, binary pump HPG-3400RS, autosampler WPS-3000TRS, column compartment TCC-3000RS, diode array detector DAD-3000RS, heated electrospray HESI II probe, mass detector Velos Pro and a PC with LTQ Tune Plus 2.8 and Xcalibur 4.2.47 software.

The LC-MS/MS system was equipped with a chromatographic column Thermo Acclaim C30 (150 x 2.1 mm, 3  $\mu$ m) maintained at 15°C. Mobile phase A was prepared by diluting 0.6306 g of ammonium formate with 1 L of water containing 175  $\mu$ L of formic acid (pH 4.0). Mobile phase B was prepared by diluting 0.6306 g of ammonium formate with 1 L of water containing 1750  $\mu$ L of formic acid (pH 3.0). Mobile phase C was prepared by diluting 0.0568 g of ammonium formate with 10 mL of mobile phase B and 90 mL of acetonitrile. All mobile phases were prepared daily, filtered through a 0.2  $\mu$ m nylon filter and degassed before use.

Chromatographic separation was achieved at a flow rate 0.4 mL/min using a gradient of mobile phase A, B and C as follows: (I) 100% mobile phase A from 0 to 5 min, (II) 100% mobile phase B from in 5 min, (III) linear gradient increase to 35% C from 5 to 17 min, (IV) equilibration at starting conditions (100% A) from 17 to 25 min. Injection volume was 10  $\mu$ L.

Mass spectrometry analysis was completed by multiple reaction monitoring (MRM) or single ion monitoring (SIM) in ESI positive mode using the following tune parameters:

capillary voltage = 4 kV, desolvation temperature = 350 °C, sheath gas flow rate = 60 arb., auxiliary gas flow rate = 20 arb., transfer capillary temperature = 350 °C, S-lens RF level = 60 %, Front lens = -9 V, Ion time (MRM) = 200 ms, Ion time (SIM) = 200 ms.

## 2.5 Method validation

Linearity of calibration curves constructed from 6 - 9 concentration levels (each concentration level in triplicate) was evaluated using two acceptability criteria: correlation coefficient ( $R \geq 0.9900$ ) and quality coefficient ( $QC \geq 5.0$  %). Instrument detection limit (IDL) and instrument quantitation limit (IQL) were calculated based on signal-to-noise ratio  $S/N = 3$  and  $S/N = 10$ , respectively.

Accuracy, precision and process efficiency were assessed using spiked whole blood samples to achieve a concentration increase of all analytes of 10 and 100  $\mu\text{g/L}$ . All spiked samples were prepared by both sample preparation procedures using TCA and  $\text{ZnSO}_4$ /methanol, each in triplicate. Accuracy was determined as the relative error (%) and was expressed as recovery:  $(\text{measured concentration} - \text{nominal concentration}) / \text{nominal concentration} \times 100$ . The precision was determined as the coefficient of variation (%) and was expressed as repeatability:  $(\text{standard deviation} / \text{mean concentration measured}) \times 100$ . Process efficiency (%) was determined:  $(\text{peak area of an analyte in spiked sample} / \text{peak area of the same analyte in standard solution}) \times 100$ .

Potential carry-over effects were assessed by monitoring the signal in a blank sample analysed immediately after the analysis of the highest calibration solution (500  $\mu\text{g/L}$ ).

### **3. Results and discussion**

#### **3.1 Optimization of chromatographic and detection conditions**

The initial chromatographic and detection conditions were taken over from the Thermo Application Note 294 [21]. The method was optimized to achieve the most stable detector response and the lowest limits of quantitation as possible. At first, ion source parameters were tested to prove that stability of detector response is less than 15 %. Then, fundamental ion optic parameters S-lens RF level (from 0 to 70 %; optimum at 60 %) and Front lens voltage (from -15.0 to -5 V; optimum at -9.0 V) were optimized to ensure the most effective ion transmission from the ion source to the mass analyser. Finally, normalised collision energy (from 0 to 100 %), product ion choice and ion time (from 1 to 500 ms) were chosen to achieve the highest detector response and sufficient number of data points (at least 15 points) across a chromatographic peak. Optimal normalised collision energy needed to achieve optimum fragmentation efficiency ranged from 25 to 50 % for almost all analytes excluding B3, B3-AM and IS-B3. Precursor ions of these compounds do not provide any stable product ion after application of any normalised collision energy – precursor ions either do not fragment at all or fragment totally using this linear ion trap mass analyser. Due to this fact, only SIM mode remained to be chosen in this case. With respect to relatively low scan speed (in comparison with e.g., triple quadrupole or time-of-flight mass analysers), mass detection was divided into 4 different scan windows (2.0-7.0 min, 5.0-11.0 min, 11.0-15.5 min and 15.0-20.0 min) during chromatographic analysis to ensure as long ion time for each analyte or internal standard as possible. All optimal detection conditions for each analyte are listed in Table 1, general detection conditions are mentioned at the end of Chapter 2.4.

### **3.2 Validation characteristics of calibration curves**

Calibration curves were measured within the range of 1–500 µg/L, but the whole range of the acceptability criteria ( $R \geq 0.9900$  and  $QC \geq 5.0\%$ ) were fulfilled only for B2, B6, B7 and B12. In the case of other analytes, calibration ranges needed to be narrowed down either from the lowest concentrations (B3, B3-AM, B5 and B6-5P) or from the highest concentrations (B1, B6-4PA or B9). Calibration curve of B9-THF was not assessed due to the lack of data caused by insufficient detector response – instrument quantitation limit lies at the highest calibration level (500 µg/L). Correlation coefficients ranged within very good interval of 0.9997–1.0000, quality coefficients ranged from 0.53 to 3.4 %. The best validation characteristics were obtained for B5 ( $R = 1.0000$ ,  $QC = 0.53\%$ ), the worst results were achieved for B9 ( $R = 0.9997$ ,  $QC = 3.4\%$ ). Instrument quantitation limits ranged from 0.42 to 4.5 µg/L except for B9-THF (500 µg/L). Validation data are listed in the Table 2.

### **3.3 Effect of protein-precipitating agents on accuracy, precision and process efficiency of the method**

Protein-precipitating agent could play a crucial role in sample pre-treatment for trace analysis. Whole blood is one of the most challenging matrixes for LC/MS technique due to negative ionization effects during electrospray ionization. Results of comprehensive study [22] focused on optimization of protein precipitation from plasma samples based upon effectiveness of protein removal and ionization effect in LC-MS/MS shows that 10 % TCA is an optimal protein-precipitating agent for removal of plasma proteins, together with minimal ionization effect. Nevertheless, whole blood is more complex matrix than plasma and sample pre-treatment step must overcome not only sufficient protein precipitation but also haemolysis step for an efficient release of

analytes presented in erythrocytes. Finally, physicochemical properties (e.g., pH) of a protein-precipitating agent have to be taken into consideration with regard to the analytes stability. One of the very effective non-acidic agents for whole blood precipitation is 0.2 M zinc sulphate solution in organic solvent [23, 24]. Both sample preparation methods mentioned above were assessed for presented determination of B vitamins in whole blood using LC/MS in this article.

Protein precipitation using ZnSO<sub>4</sub>/methanol provides better results at both spike levels 10 and 100 µg/L in general, but B6-5P, B9 and B9-THF were not detected regardless of used protein-precipitating agent. Ranges of evaluated parameters (accuracy, precision and process efficiency) of the remaining analytes were narrower and closer to optimal values in almost all cases except for precision at 100 µg/L (1.0–13 % for ZnSO<sub>4</sub>/methanol, but 1.6–6.8 % for TCA). Worse precision in case of protein precipitation using ZnSO<sub>4</sub>/methanol was observed for B1 at both spike levels – 9.9 % at 10 µg/L (TCA 4.0 %) and 13 % at 100 µg/L (TCA 1.6 %). This higher variability of precision values is caused by peak broadening due to the high percentage of organic solvent in ZnSO<sub>4</sub>/methanol solution (70 %), relatively high injection volume (10 µL) and narrow chromatographic column (2.1 mm). Excluding B1 results, precision ranged from 0.50 to 7.1 % at 10 µg/L and from 1.0 to 6.2 at 10 µg/L.

The choice of the precipitating agent also significantly affects the accuracy of the method. In the case of TCA agent the accuracy ranged from 26 to 122 % at 10 µg/L and from 30 to 112 % at 100 µg/L but better results were obtained in the case of ZnSO<sub>4</sub>/methanol - from 90 to 114 % at 10 µg/L and from 89 to 120 % at 100 µg/L. Low accuracy when using TCA is noticeable for three B vitamins: B12 (26 % at 10 µg/L and 30 % at 100 µg/L), B2 (51 % at 10 µg/L and 56 % at 100 µg/L) and B5 (55 % at 10 µg/L and 68 % at 100 µg/L).

Process efficiency (PE) assesses LC-MS method as a whole because this parameter takes into consideration not only contributions of matrix effects but also efficiency (recovery) of the extraction process. The method using TCA agent for protein precipitation step shows rather big differences at both spike levels 10 and 100 µg/L in this parameter – PE of three B vitamins were higher than 150 % (B1, B3 and B6), PE of three B vitamins were lower than 50 % (B2, B7 and B12) and only three B vitamins provides PE between 50–150 % (B3-AM: 94 and 101 %; B5: 111 and 117 %; B6-4PA: 100 and 107 %). Much better results were obtained using the ZnSO<sub>4</sub>/methanol method because PE were ranging from 65 to 108 % at both spike levels 10 and 100 µg/L for all nine B vitamins (B1, B2, B3, B3-AM, B5, B6, B6-4PA, B7 and B12).

### **3.4 Stability of B vitamins in whole blood samples**

The stability of B vitamins in the whole blood samples spiked at 100 µg/L level was evaluated at -18°C to check whether a short-time storage of blood in collection tubes in an ordinary freezer does not affect concentration of analytes. The stability of B6 is decreased at such conditions, 17 % content decrease was observed after one day, and 51 % content decrease in four-day storage time. The content of B1, B2, B3, B5, B6-PA, B7 and B12 was stable for the first three days, on the fourth day a decrease of 5-23 % was observed. Such results correspond to the previously reported observations of stability of B vitamins in whole blood [25], B1 in the erythrocytes [20] or vitamins B9 and B12 in human serum [26]. Slight differences may be due to EDTA presence in the previous studies. The content of B3-AM could not be evaluated due to the high detector response that lies in the range of calibration curve due to its extremely high concentration in the tested whole blood sample. However, B3-AM, as well as B3, are generally known for a sufficient stability at various conditions and their activity is not



affected by heat, light, acid, alkali or oxidation [27]. Remaining B vitamins (B6-5P, B9 and B9-THF) were not detected due to unsuccessful validation characteristics of the tested sample preparation methods using trichloroacetic acid (Table 3) or ZnSO<sub>4</sub>/methanol (Table 4) as a precipitating agent.

## **4. Conclusions**

The aim of this work was to quantify simultaneously seven B vitamins and two B vitamin derivatives in a whole blood. The suitability of two different protein precipitating agents was compared using ZnSO<sub>4</sub>/methanol and trichloroacetic acid. Attention was focused on detailed optimization of mass detection using linear ion trap mass analyser for rapid and robust LC-MS/MS method. The usage of ZnSO<sub>4</sub>/methanol instead of trichloroacetic acid for protein precipitation step provides high percentages of accuracy, precision and process efficiency. As far as we know, this is the first method that allows to quantify thiamine, riboflavin, niacin, niacinamide, pantothenic acid, pyridoxine, 4-pyridoxic acid, biotin and cyanocobalamine in a whole blood simultaneously.

## **Declaration of competing interest**

All authors declare no conflict of interest.

## **Acknowledgements**

The authors gratefully acknowledge the financial support of the research provided by the grant project No. 18-07711S sponsored by the Czech Science Foundation.

## Reference

- [1] A. E. Douglas, "Multiorganismal Insects: Diversity and Function of Resident Microorganisms," *Annual Review of Entomology*, vol. 60, pp. 17-34, 2015.
- [2] G. Nogge, "Significance of symbionts for the maintenance of an optimal nutritional state for successful reproduction in hematophagous arthropods," *Parasitology*, vol. 82, pp. 101-104, 1981.
- [3] O. Puchta, "Experimentelle Untersuchungen über die Bedeutung der Symbiose der Kleiderlaus *Pediculus vestimenti* Burm," *Zeitschrift für Parasitenkunde*, vol. 17, pp. 1-40, 1955.
- [4] L. Akman, A. Yamashita, H. Watanabe, K. Oshima, T. Shiba, M. Hattori and S. Aksoy, "Genome sequence of the endocellular obligate symbiont of tsetse flies, *Wigglesworthia glossinidia*," *Nature Genetics*, vol. 32, 2002.
- [5] J. Ríhová, E. Nováková, F. Husník and V. Hypša, "Legionella Becoming a Mutualist: Adaptive Processes Shaping the Genome of Symbiont in the Louse *Polyplax serrata*," *Genome Biology and Evolution*, vol. 9, no. 11, pp. 2946-2957, 2017.
- [6] E. F. Kirkness, B. J. Haas, W. Sun, H. R. Braig, M. A. Perotti, J. M. Clark, S. H. Lee, H. M. Robertson, R. C. Kennedy, E. Elhaik, D. Gerlach, E. V. Kriventseva, C. G. Elsik, D. Graur, C. A. Hill, J. A. Veenstra, B. Walenz, J. M. M. C. Tubío, J. M. C. Ribeiro, J. Rozas, J. S. Johnston, J. T. Reese, A. Popadic, M. Tojo, D. Raoult, D. L. Reed, Y. Tomoyasu, E. Kraus, O. Mittapalli, V. M. Margam, H.-M. Li, J. M. Meyer, R. M. Johnson, J. Romero-Severson, J. P. VanZee, D. Alvarez-Ponce, F. G. Vieira, M. Aguadé, S. Guirao-Rico, J. M. Anzola, K. S. Yoon, J. P. Strycharz, M. F. Unger, S. Christley, N. F. Lobo, M. J. Seufferheld, N. Wang, G. A. Dasch, C. J. Struchiner, G. Madey, L. I. Hannick, S. Bidwell, V. Joardar, E. Caler, R. Shao, S. C. Barker, S. Cameron, R. V. Bruggner, A. Regier, J. Johnson, L. Viswanathan, T. R. Utterback, G. G. Sutton, D. Lawson, R. M. Waterhouse, J. C. Venter, R. L. Strausberg, M. R. Berenbaum, F. H. Collins, E. M. Zdobnov and B. R. Pittendrigh, "Genome sequences of the human body louse and its primary endosymbiont provide insights into the permanent parasitic lifestyle," *Proceedings of the National Academy of Sciences*, vol. 107, no. 27, pp. 12168-12173, 2010.
- [7] N. Nikoh, T. Hosokawa, M. Moriyama, K. Oshima, M. Hattori and F. Takema, "Evolutionary origin of insect-Wolbachia nutritional mutualism," *Proceedings of the National Academy of Sciences*, vol. 111, no. 28, pp. 10257-10262, 2014.
- [8] B. B. Boyd, J. M. Allen, N.-P. Nguyen, P. Vachaspati, Z. S. Quicksall, T. Warnow, L. Mugisha, K. P. Johnson and D. L. Reed, "Primates, Lice and Bacteria: Speciation and Genome Evolution in the Symbionts of Hominid Lice," *Molecular Biology and Evolution*, vol. 34, no. 7, pp. 1743-1757, 2017.
- [9] H. Iwakawa, T. Fukui, T. Fukuwatari, S. Bamba, M. Sasaki, T. Tsujikawa, Y. Doi and K. Shibata, "Blood concentrations and renal clearance of water-soluble vitamins in outpatients with ulcerative colitis," *Biomedical Reports*, vol. 10, no. 3, pp. 202-210, 2019.
- [10] J. Puts, M. de Groot, M. Haex and B. Jakobs, "Simultaneous Determination of Underivatized Vitamin B1 and B6 in Whole Blood by Reversed Phase Ultra High Performance Liquid Chromatography Tandem Mass Spectrometry," *PLoS ONE*, vol. 10, no. 7, 2015.
- [11] X. J. Y. Z. H. Y. K. M. Q. D. L. Zakia Fatima, "Recent trends in analytical methods for water-soluble vitamins," *Journal of Chromatography A*, p. 360245, 2019.
- [12] E. G. E. K. F. Martin, "New methods for the analysis of water-soluble

- vitamins in infant formula and adult/pediatric nutritionals," *Journal of AOAC International*, pp. 19-25, 2016.
- [13] C. J. Bates, "Vitamin analysis," *Annals of Clinical Biochemistry*, vol. 34, pp. 599-626, 1997.
- [14] M. F. Y. ,. S. T. ,. K. R. Sweekruthi A. Shetty, "Quantification of B-vitamins from different fresh milk samples using ultra-high performance liquid chromatography mass spectrometry/selected reaction monitoring methods," *Journal of Chromatography A*, vol. 1609, p. 460452, 2020.
- [15] E. Y. L. A. D. Hampel, "Ultra-performance liquid chromatography tandem mass-spectrometry (UPLC-MS/MS) for the rapid, simultaneous analysis of thiamin, riboflavin, flavin adenine dinucleotide, nicotinamide and pyridoxal in human milk," *Journal of Chromatography B*, vol. 903, pp. 7-13, 2012.
- [16] S. B. M. A. S. T. E. C.-G. K. Redeuil, "A novel methodology for the quantification of B-vitamins in breast milk," *Journal of Analytical & Bioanalytical Techniques*, vol. 8, 2017.
- [17] K. L. S. B. C. M. E. C.-G. K.M. Redeuil, "Simultaneous quantification of 21 water soluble vitamin circulating forms in human plasma by liquid chromatography-mass spectrometry," *Journal of Chromatography A*, vol. 1422, pp. 89-98, 2015.
- [18] F. A. Robinson, *The vitamin B complex*, New York: Wiley, 1951.
- [19] J. Schrijver, A. J. Speek , J. A. Klosse, H. J. van Rijn and W. H. Schtrurs, "A reliable semi-automated method for the determination of total thiamin in whole blood by the thiochrome method with high performance liquid chromatography," *Annals of Clinical Biochemistry*, vol. 19, pp. 52-56, 1982.
- [20] D. Talwar, H. Davidson, J. Cooney and D. S. JO'Reilly, "Vitamin B1 Status Assessed by Direct Measurement of Thiamin Pyrophosphate in Erythrocytes or Whole Blood by HPLC: Comparison with Erythrocyte Transketolase Activation Assay," *Clinical Chemistry*, vol. 46, no. 5, pp. 704-710, 2000.
- [21] J. L. Wang, X. Liu and W. Schnute, *Simultaneous Analysis of Water-Soluble Vitamins in Vitamin-Enriched Beverages and Multivitamin Dietary Supplements by UHPLC-MS/MS*, Sunnyvale, California: Thermo Fisher Scientific Inc., 2011.
- [22] C. Polson, P. Sarkar, B. Incledon, V. Raguvaran and R. Grant, "Optimization of protein precipitation based upon effectiveness of protein removal and ionization effect in liquid chromatography-tandem mass spectrometry," *Journal of Chromatography B*, vol. 785, pp. 263-275, 2003.
- [23] M. Brusius, "Navigating the Vast Array of Sample Preparation Techniques for Biological Samples - Whole Blood," *Chromatography Today*, 2016.
- [24] R. N. Xu, M. R. Rieser and T. A. El-Shourbagy, "Current Methods for the Quantitative Analysis of Pharmaceutical Compounds from Whole Blood Matrix Using Liquid Chromatography Mass Spectrometry," in *Reviews in Pharmaceutical and Biomedical Analysis*, Sarjah, Bentham Science Publishers, 2010, pp. 52-62.
- [25] M. C. Ocké, J. Schrijver, G. L. Obermann-de Boer, B. P. Bloemberg, G. R. Haenen and D. Kromhout, "Stability of blood (pro)vitamins during four years of storage at - 20 C: Consequences for epidemiologic research," *Journal of Clinical Epidemiology*, vol. 48, no. 8, pp. 1077-1085, 1995.
- [26] P. K. B. J. W. C. E. S. Eugène H.J.M. Jansen, "Long-term (in)stability of folate and vitamin B 12 in human serum," *Clinical Chemistry and Laboratory Medicine*, vol. 50, no. 10, p. 1761-1763, 2012.

- [27] P. Lawrance, "Niacin (Vitamin B3) - A review of analytical methods for use in food," *Government Chemist Programme Report*, pp. 1-9, 2015.
- [28] C. Cuerq, N. Peretti, K. Chikh, A. Mialon, M. Guillaumont, J. Draï and E. Blond, "Overview of the in vitro stability of commonly measured vitamins and carotenoids in whole blood," *Annals of Clinical Biochemistry*, vol. 52, no. 2, pp. 259-269, 2015.
- [29] "Guidelines for Standard Method Performance Requirements , Appendix F," in *Official Methods of Analysis*, Rockville, Maryland: AOAC INTERNATIONAL, 2016, p. 9.

## Figure captions

**Figure 1:** Representative chromatogram of the highest calibration solution (500 µg/L).

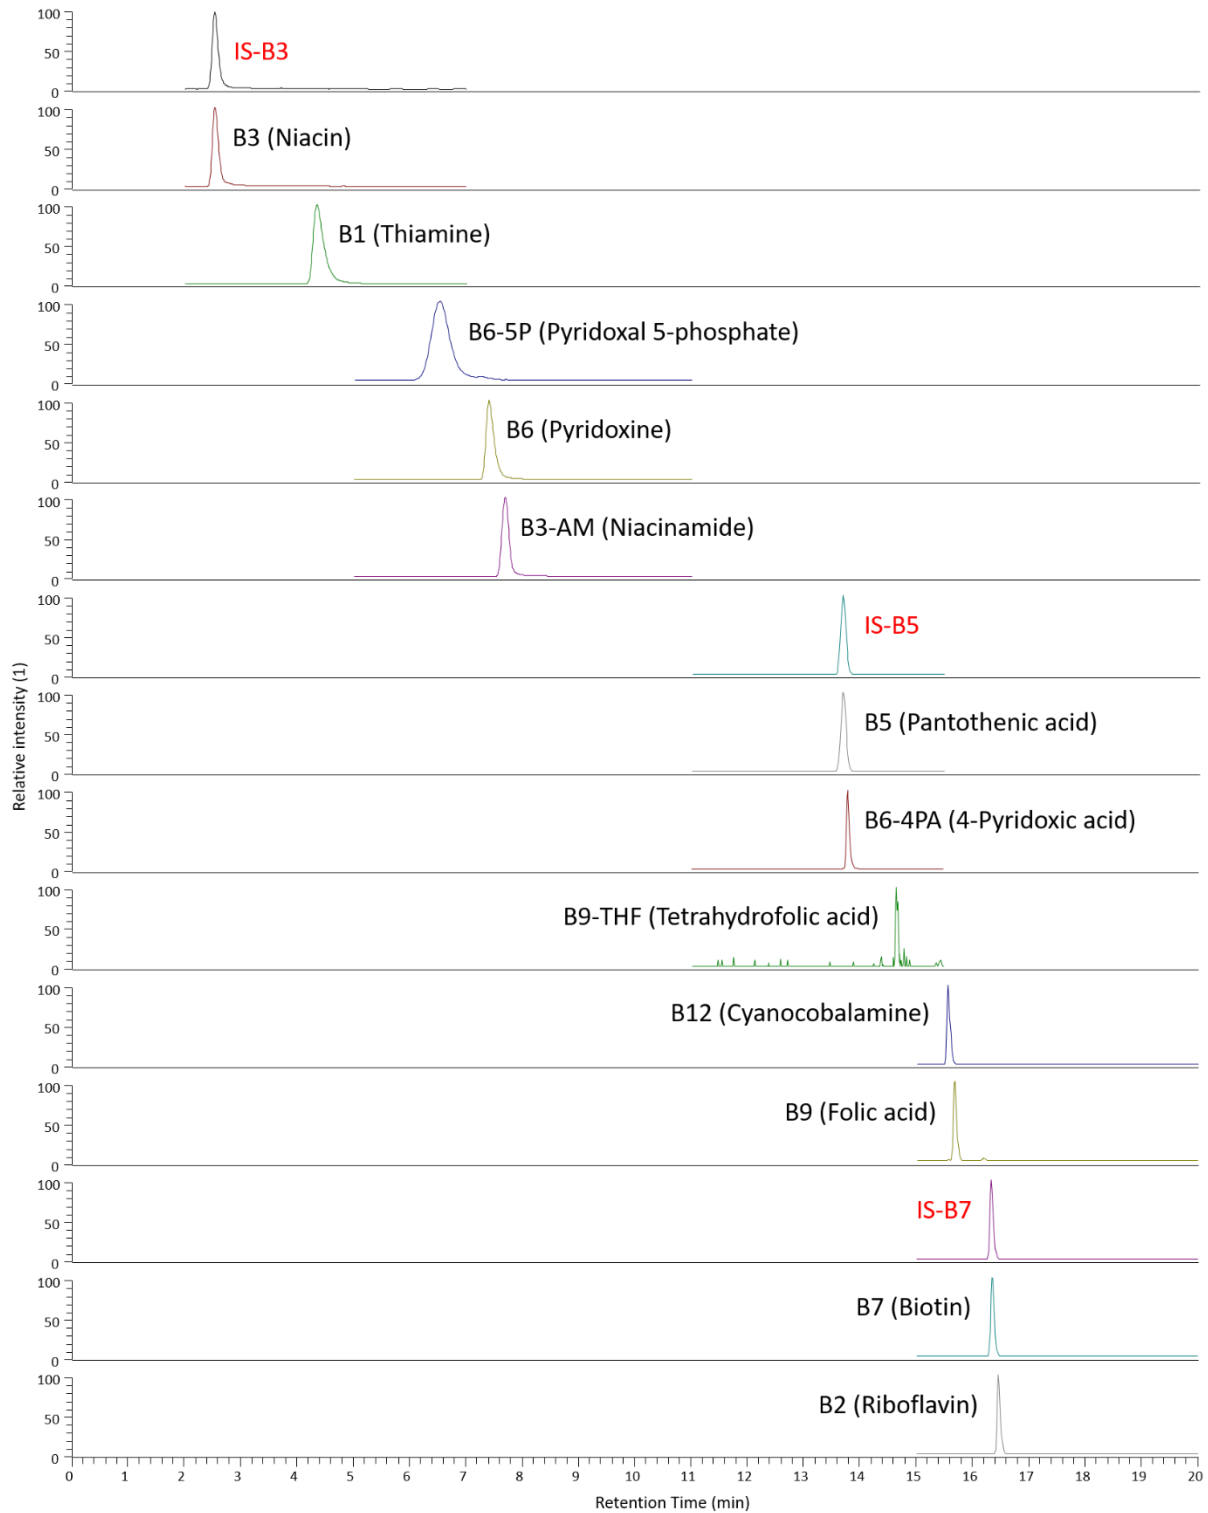

## 1 Tables

2 **Table 1:** Optimal detection conditions.

| Compound                              | Class             | Retention time<br>(min) | Scan window<br>(min) | SIM<br>(1) | MRM                  |                    | Normalized collision energy<br>(%) |
|---------------------------------------|-------------------|-------------------------|----------------------|------------|----------------------|--------------------|------------------------------------|
|                                       |                   |                         |                      |            | Precursor ion<br>(1) | Product ion<br>(1) |                                    |
| IS - Vitamin B3 (Niacin)              | Internal standard | 2.6                     | 2.0-7.0              | 130.0      | -                    | -                  | -                                  |
| Vitamin B3 (Niacin)                   | Analyte           | 2.6                     |                      | 124.0      | -                    | -                  | -                                  |
| Vitamin B1 (Thiamine)                 | Analyte           | 4.4                     |                      | -          | 265.1                | 122.0              | 30                                 |
| Vitamin B6-5P (Pyridoxal 5-phosphate) | Analyte           | 6.6                     |                      | -          | 248.1                | 150.0              | 27                                 |
| Vitamin B6 (Pyridoxine)               | Analyte           | 7.4                     | 5.0-11.0             | -          | 170.1                | 152.0              | 30                                 |
| Vitamin B3-AM (Niacinamide)           | Analyte           | 7.7                     |                      | 123        | -                    | -                  | -                                  |
| IS - Vitamin B5 (Pantothenic acid)    | Internal standard | 13.7                    | 11.0-15.5            | -          | 224.1                | 206.0              | 50                                 |
| Vitamin B5 (Pantothenic acid)         | Analyte           | 13.7                    |                      | -          | 220.1                | 202.0              | 50                                 |
| Vitamin B6-4PA (4-Pyridoxic acid)     | Analyte           | 13.8                    |                      | -          | 184.1                | 166.0              | 25                                 |
| Vitamin B9-THF (Tetrahydrofolic acid) | Analyte           | 14.6                    |                      | -          | 446.2                | 299.1              | 45                                 |
| Vitamin B12 (Cyanocobalamine)         | Analyte           | 15.6                    |                      | -          | 678.4                | 359.0              | 20                                 |
| Vitamin B9 (Folic acid)               | Analyte           | 15.7                    |                      | -          | 442.2                | 295.0              | 50                                 |
| IS - Vitamin B7 (Biotin)              | Internal standard | 16.4                    | 15.0-20.0            | -          | 247.1                | 229.0              | 50                                 |
| Vitamin B7 (Biotin)                   | Analyte           | 16.4                    |                      | -          | 245.1                | 227.0              | 50                                 |
| Vitamin B2 (Riboflavin)               | Analyte           | 16.5                    |                      | -          | 377.1                | 243.0              | 30                                 |

**Table 2:** Validation characteristics of calibration curves.

| Analyte                               | Internal standard | Instrument detection limit | Instrument quantitation limit | Range     | Correlation coefficient | Quality coefficient |
|---------------------------------------|-------------------|----------------------------|-------------------------------|-----------|-------------------------|---------------------|
|                                       | (-)               | (µg/L)                     | (µg/L)                        | (µg/L)    | (1)                     | (1)                 |
| Vitamin B1 (Thiamine)                 | IS-B3             | 0.13                       | 0.42                          | 1 - 100   | 0.9999                  | 2.0                 |
| Vitamin B2 (Riboflavin)               | IS-B7             | 0.27                       | 0.91                          | 1 - 500   | 1.0000                  | 1.3                 |
| Vitamin B3 (Niacin)                   | IS-B3             | 1.2                        | 3.8                           | 10 - 500  | 0.9999                  | 1.7                 |
| Vitamin B3-AM (Niacinamide)           | IS-B3             | 1.5                        | 5.0                           | 5 - 500   | 0.9998                  | 2.7                 |
| Vitamin B5 (Pantothenic acid)         | IS-B5             | 0.18                       | 0.56                          | 2.5 - 500 | 1.0000                  | 0.53                |
| Vitamin B6 (Pyridoxine)               | IS-B5             | 0.14                       | 0.45                          | 1 - 500   | 0.9998                  | 2.9                 |
| Vitamin B6-5P (Pyridoxal 5-phosphate) | IS-B3             | 1.4                        | 4.5                           | 5 - 500   | 0.9999                  | 1.8                 |
| Vitamin B6-4PA (4-Pyridoxic acid)     | IS-B5             | 0.30                       | 1.0                           | 1 - 100   | 0.9997                  | 3.2                 |
| Vitamin B7 (Biotin)                   | IS-B7             | 0.27                       | 0.91                          | 1 - 500   | 1.0000                  | 1.3                 |
| Vitamin B9 (Folic acid)               | IS-B7             | 0.21                       | 0.71                          | 1 - 100   | 0.9997                  | 3.4                 |
| Vitamin B9-THF (Tetrahydrofolic acid) | IS-B7             | 150                        | 500                           | n.a.      | n.a.                    | n.a.                |
| Vitamin B12 (Cyanocobalamine)         | IS-B5             | 0.30                       | 1.0                           | 1 - 500   | 0.9999                  | 2.2                 |



4

**Table 3:** Validation characteristics of the method using TCA as a precipitating agent.

| Analyte                               | Spike 10 µg/L   |                  |                              | Spike 100 µg/L  |                  |                              |
|---------------------------------------|-----------------|------------------|------------------------------|-----------------|------------------|------------------------------|
|                                       | Accuracy<br>(%) | Precision<br>(%) | Process<br>efficiency<br>(%) | Accuracy<br>(%) | Precision<br>(%) | Process<br>efficiency<br>(%) |
| Vitamin B1 (Thiamine)                 | 73              | 4.0              | 229                          | 78              | 1.6              | 166                          |
| Vitamin B2 (Riboflavin)               | 51              | 1.8              | 29                           | 56              | 2.3              | 30                           |
| Vitamin B3 (Niacin)                   | 91              | 8.4              | 250                          | 102             | 5.7              | 199                          |
| Vitamin B3-AM (Niacinamide)           | 71              | 6.2              | 94                           | 79              | 4.8              | 101                          |
| Vitamin B5 (Pantothenic acid)         | 55              | 2.7              | 117                          | 68              | 1.6              | 111                          |
| Vitamin B6 (Pyridoxine)               | 122             | 7.1              | 156                          | 112             | 4.7              | 151                          |
| Vitamin B6-5P (Pyridoxal 5-phosphate) | < 1             | n.a.             | n.a.                         | < 1             | n.a.             | n.a.                         |
| Vitamin B6-4PA (4-Pyridoxic acid)     | 88              | 5.8              | 100                          | 85              | 2.2              | 107                          |
| Vitamin B7 (Biotin)                   | 93              | 2.9              | 44                           | 95              | 2.5              | 61                           |
| Vitamin B9 (Folic acid)               | < 1             | n.a.             | n.a.                         | < 1             | n.a.             | n.a.                         |
| Vitamin B9-THF (Tetrahydrofolic acid) | < 1             | n.a.             | n.a.                         | < 1             | n.a.             | n.a.                         |
| Vitamin B12 (Cyanocobalamine)         | 26              | 24               | 41                           | 30              | 6.8              | 43                           |
| Range                                 | 26–122          | 1,8–24           | 29–250                       | 30–112          | 1.6–6.8          | 30–199                       |

5

6

**Table 4:** Validation characteristics of the method using ZnSO<sub>4</sub>/methanol as a precipitating agent.

| Analyte                               | Spike 10 µg/L   |                  |                              | Spike 100 µg/L  |                  |                              |
|---------------------------------------|-----------------|------------------|------------------------------|-----------------|------------------|------------------------------|
|                                       | Accuracy<br>(%) | Precision<br>(%) | Process<br>efficiency<br>(%) | Accuracy<br>(%) | Precision<br>(%) | Process<br>efficiency<br>(%) |
| Vitamin B1 (Thiamine)                 | 99              | 9.9              | 96                           | 116             | 13               | 75                           |
| Vitamin B2 (Riboflavin)               | 108             | 3.4              | 87                           | 105             | 3.6              | 75                           |
| Vitamin B3 (Niacin)                   | 100             | 7.0              | 91                           | 89              | 6.2              | 65                           |
| Vitamin B3-AM (Niacinamide)           | 92              | 5.3              | 82                           | 90              | 5.5              | 96                           |
| Vitamin B5 (Pantothenic acid)         | 91              | 1.2              | 86                           | 92              | 1.4              | 81                           |
| Vitamin B6 (Pyridoxine)               | 114             | 0.50             | 84                           | 120             | 2.5              | 100                          |
| Vitamin B6-5P (Pyridoxal 5-phosphate) | < 1             | n.a.             | n.a.                         | < 1             | n.a.             | n.a.                         |
| Vitamin B6-4PA (4-Pyridoxic acid)     | 105             | 1.7              | 90                           | 104             | 1.0              | 91                           |
| Vitamin B7 (Biotin)                   | 90              | 3.8              | 71                           | 96              | 2.6              | 69                           |
| Vitamin B9 (Folic acid)               | < 1             | n.a.             | n.a.                         | < 1             | n.a.             | n.a.                         |
| Vitamin B9-THF (Tetrahydrofolic acid) | < 1             | n.a.             | n.a.                         | < 1             | n.a.             | n.a.                         |
| Vitamin B12 (Cyanocobalamine)         | 99              | 7.1              | 97                           | 112             | 3.7              | 108                          |
| Range                                 | 90-114          | 0.50-9.9         | 71-97                        | 89-120          | 1.0-13           | 65-108                       |

7
